# Supplementary material for: Climate Change and Pilgrimage to Shrines in Ethiopia
Source: MDPI journal article supplement (doi:10.3390/heritage7010004), 2023-12-22
Supplement: s1 [file s1]

Supplementary material for:

# Climate change and pilgrimage to shrines in Ethiopia

Peter Brimblecombe<sup>1,2</sup>, Habtamu Gizawu Tola<sup>3,4</sup> and Jenny Richards<sup>5,6\*</sup>

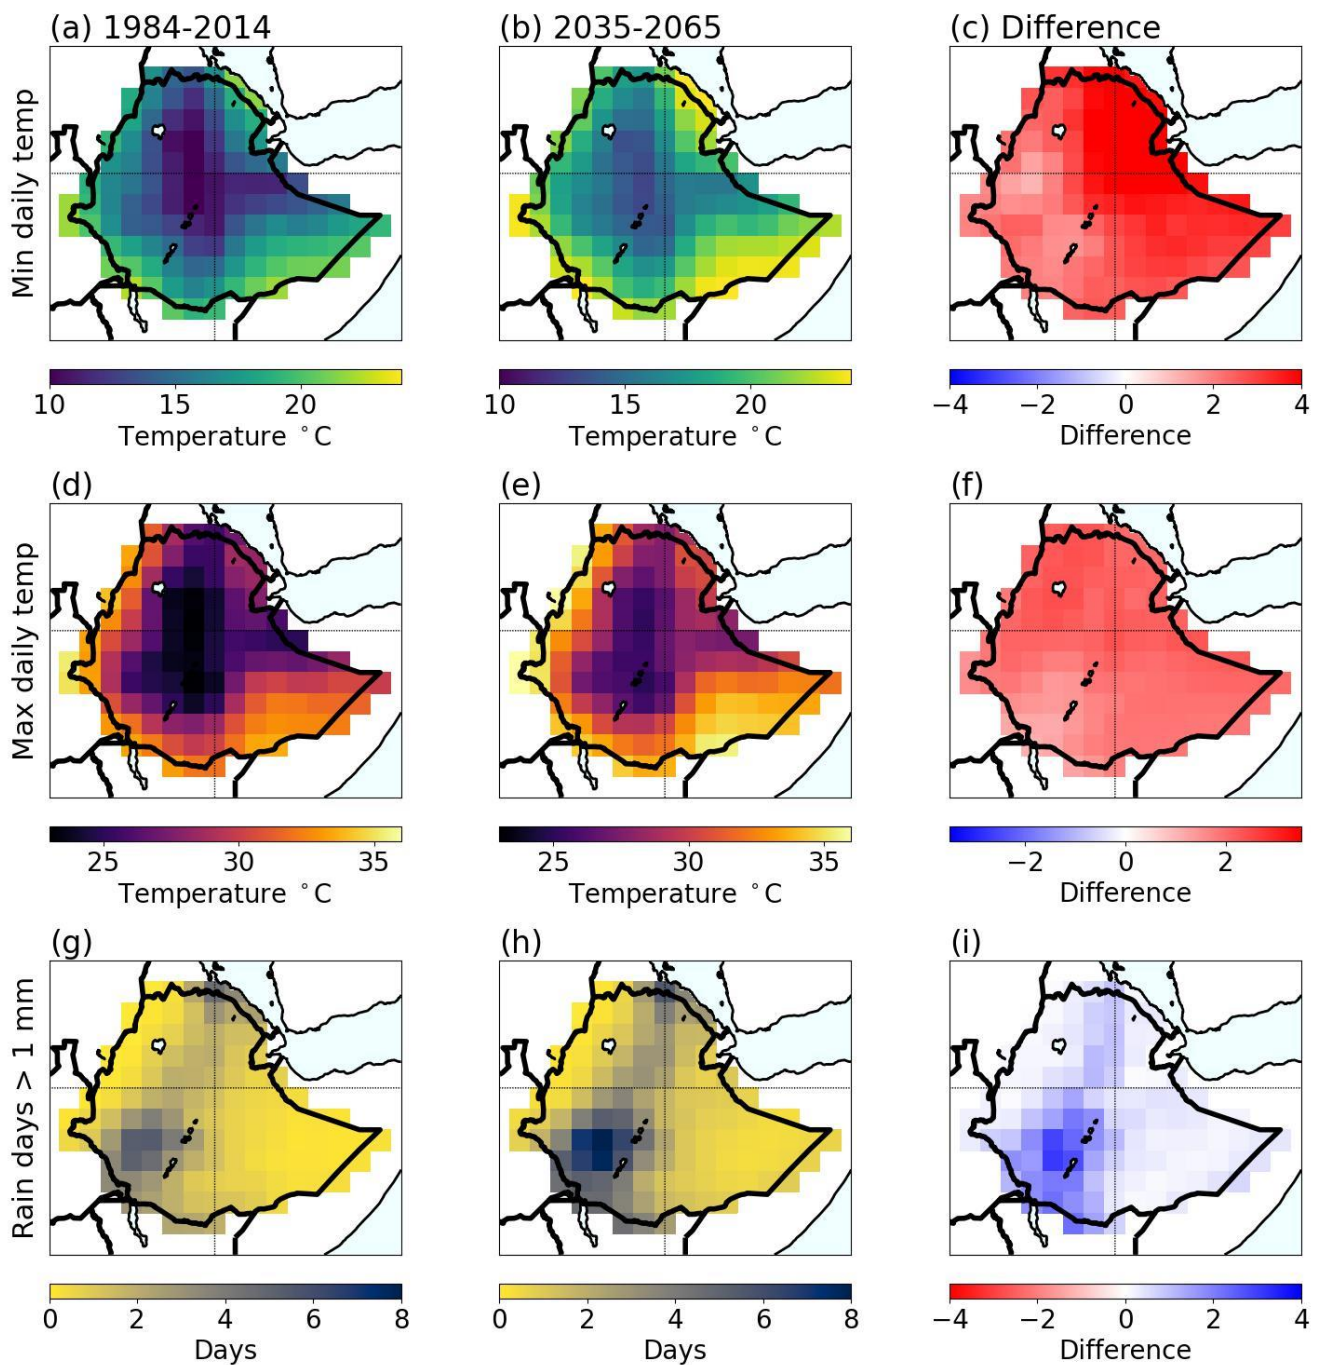

**Figure S1.** The mean modelled outputs for (a-c) minimum daily temperature (°C), (d-f) maximum daily temperature (°C) and (g-i) rain days > 1 mm for (a,d,g) the recent past: 1984-2014, (b,e,h) mid-century: 2035-2065 and (c,f,i) the difference between the future and past scenarios. All parameters are calculated for the period 1st to 15th January.

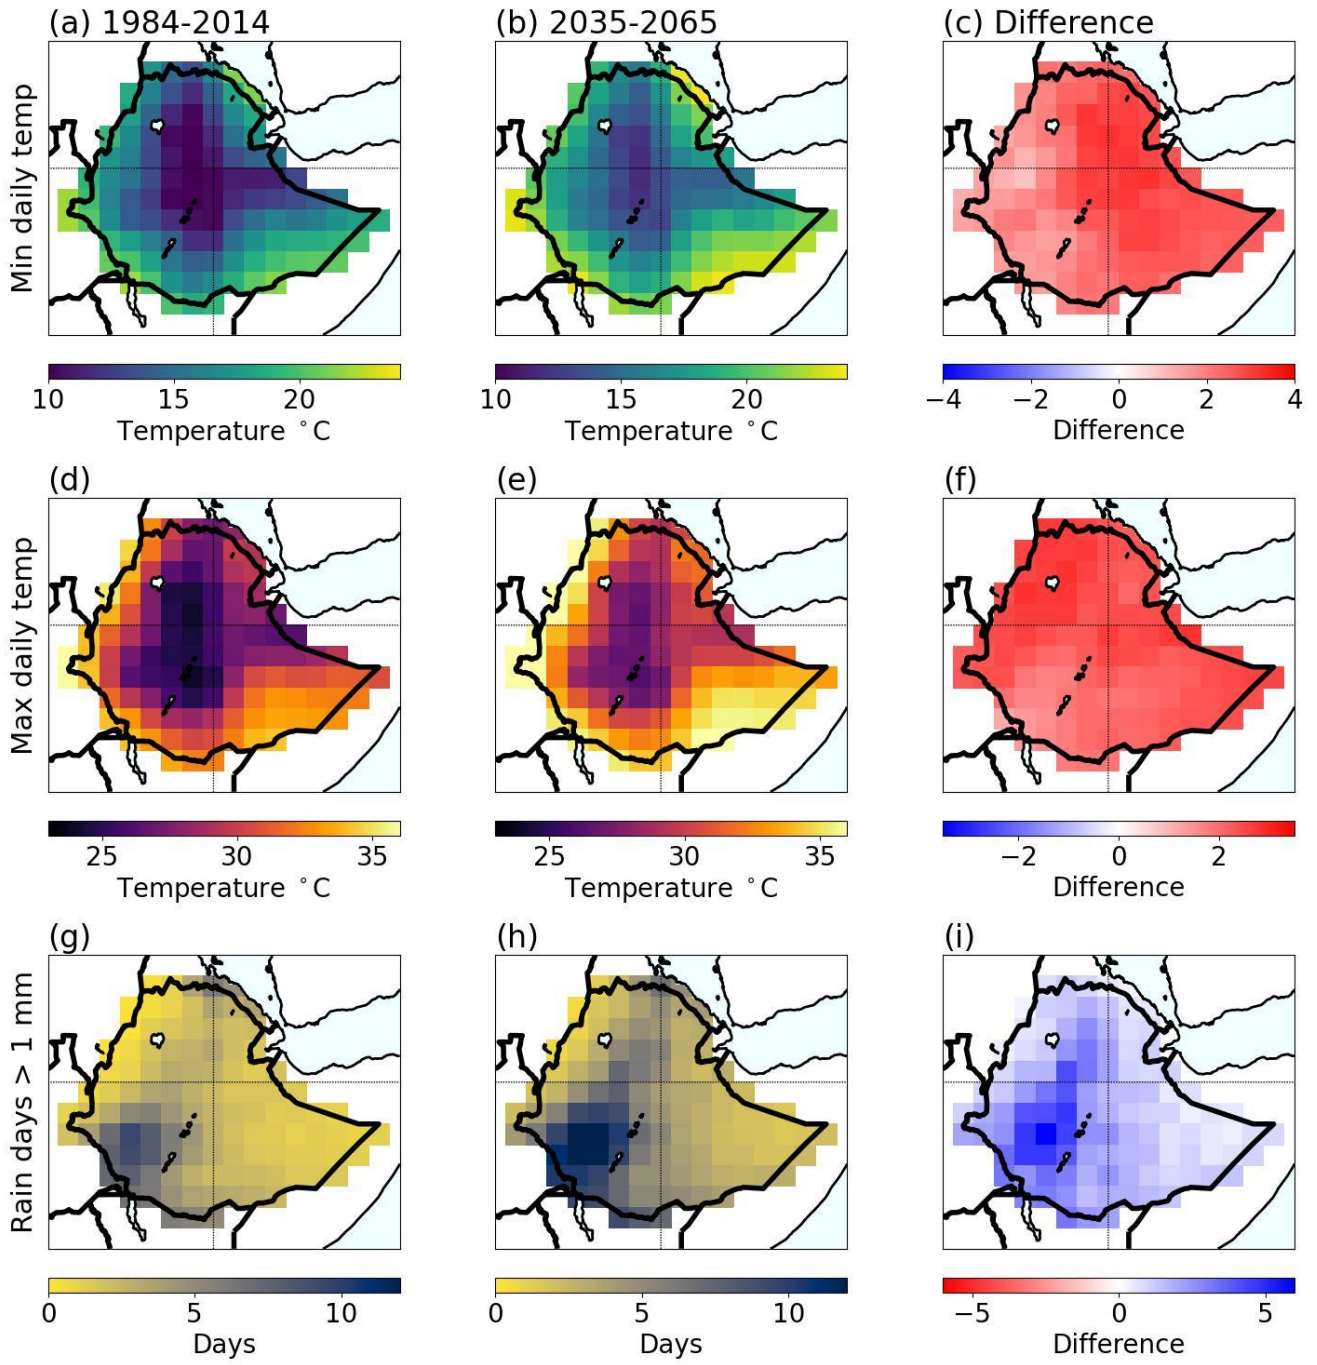

**Figure S2.** The extreme modelled outputs for (a-c) minimum daily temperature (°C), (d-f) maximum daily temperature (°C) and (g-i) rain days > 1 mm for (a,d,g) the recent past: 1984-2014, (b,e,h) mid-century: 2035-2065 and (c,f,i) the difference between the future and past scenarios. All parameters are calculated for the period 1st December to 15th February. (a-c) uses the 10th percentile and (d-i) uses the 90th percentile.
